# Supplementary material for: Defining Quality Criteria for Nanoplastic Hazard Evaluation: The Case of Polystyrene Nanoplastics and Aquatic Invertebrate Daphnia spp
Source: MDPI journal article supplement (doi:10.3390/nano13030536), 2023-01-28
Supplement: s1 [file s1]

## Supplementary Materials Figures

Figure S1 Share of ecotoxicity data points

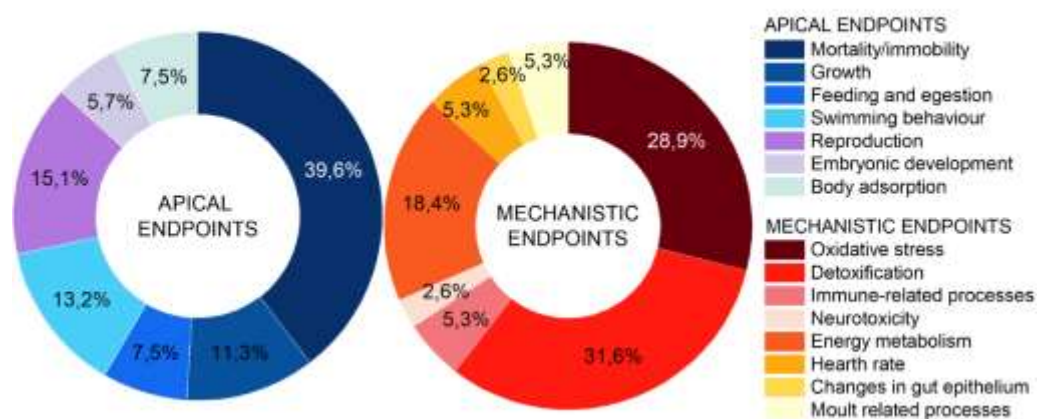

**Figure S1.** Share of ecotoxicity data points separately for apical endpoints (n= 55) and mechanistic endpoints (n=38). Data for all types of nanoPS (surface modification) are included.

**Figure S2** Distribution of apical and mechanistic endpoints for potassium dichromate

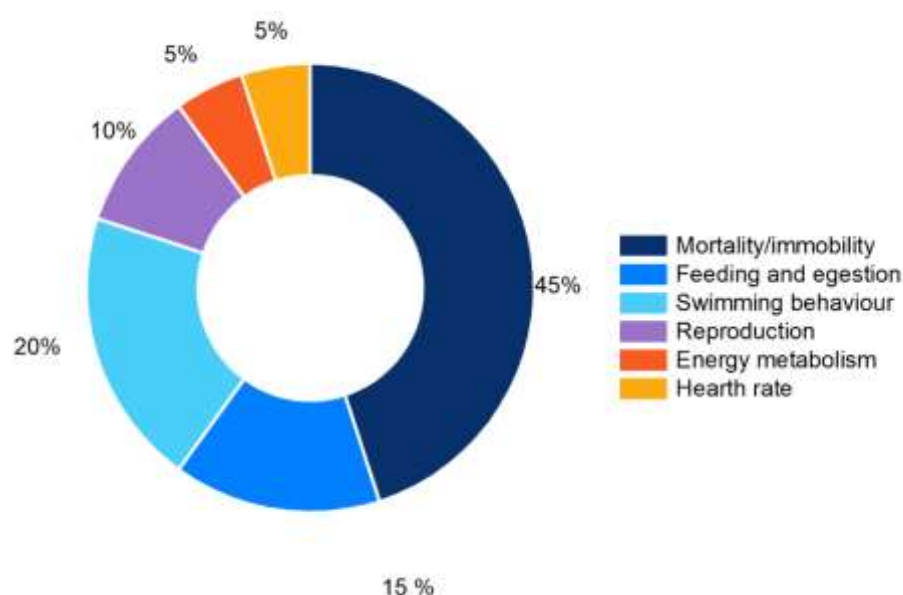

**Figure S2.** Distribution of apical and mechanistic endpoints for potassium dichromate (n=20).

**Table S1.** Matrix table.

List of studies reporting a certain property (sodium azide, functionalisation, endpoints). The outcome of study evaluation is provided.

|                        |                                                                                                                   | Sodium Azide (NaN3) |              | Functionalisation |     |      | Endpoints reported |                 | Passed the study quality evaluation |        |             |        |
|------------------------|-------------------------------------------------------------------------------------------------------------------|---------------------|--------------|-------------------|-----|------|--------------------|-----------------|-------------------------------------|--------|-------------|--------|
| Reference              |                                                                                                                   | including NaN3      | NaN3 removed | unspecified       | NH2 | CO2H | unspecified        | fluorescent dye | Other                               | Apical | Mechanistic | Yes/No |
| Cui et al., 2017       | <a href="https://doi.org/10.1038/s41598-017-12299-2">https://doi.org/10.1038/s41598-017-12299-2</a>               | x                   |              |                   |     |      |                    | x               |                                     | x      |             | No     |
| Fedare et al., 2019    | <a href="https://doi.org/10.1039/c8en01457d">https://doi.org/10.1039/c8en01457d</a>                               |                     | x            |                   | x   |      |                    | x               |                                     | x      | x           | Yes    |
| Liu et al., 2018       | <a href="https://doi.org/10.1016/j.aquatox.2018.08.017">https://doi.org/10.1016/j.aquatox.2018.08.017</a>         |                     |              | x                 |     |      | x                  |                 |                                     | x      | x           | No     |
| Liu et al., 2019       | <a href="https://doi.org/10.1016/j.chemosphere.2018.09.176">https://doi.org/10.1016/j.chemosphere.2018.09.176</a> |                     |              | x                 |     |      | x                  |                 |                                     | x      | x           | No     |
| Nasser and Lynch, 2016 | <a href="https://doi.org/10.1016/j.jpr.2015.09.005">https://doi.org/10.1016/j.jpr.2015.09.005</a>                 |                     |              | x                 | x   | x    |                    | x               |                                     | x      |             | No     |
| Rist et al., 2017      | <a href="http://dx.doi.org/10.1016/j.envpol.2017.05.048">http://dx.doi.org/10.1016/j.envpol.2017.05.048</a>       | x                   |              |                   |     |      | x                  | x               |                                     | x      |             | No     |
| Kelpsiene et al., 2020 | <a href="https://doi.org/10.1038/s41598-020-63028-1">https://doi.org/10.1038/s41598-020-63028-1</a>               |                     | x            |                   | x   | x    |                    |                 |                                     | x      |             | No     |

|                            |                                                                                                                   |   |  |   |   |   |   |   |   |  |   |    |     |
|----------------------------|-------------------------------------------------------------------------------------------------------------------|---|--|---|---|---|---|---|---|--|---|----|-----|
| Liu et al.,<br>2020        | <a href="https://doi.org/10.1016/j.aquatox.2020.105420">https://doi.org/10.1016/j.aquatox.2020.105420</a>         |   |  |   | x |   |   | x |   |  | x | No |     |
| Xu et al.,<br>2020         | <a href="https://dx.doi.org/10.1021/acs.est.0c00245">https://dx.doi.org/10.1021/acs.est.0c00245</a>               | x |  |   |   |   |   | x | x |  | x | x  | No  |
| Pikuda et al.,<br>2019     | <a href="https://doi.org/10.1021/acs.estlett.8b00614">https://doi.org/10.1021/acs.estlett.8b00614</a>             | x |  | x |   |   |   | x |   |  | x |    | No  |
| Vincentini et al.,<br>2019 | <a href="https://doi.org/10.1002/etc.4528">https://doi.org/10.1002/etc.4528</a>                                   |   |  |   |   | x |   |   |   |  | x | x  | No  |
| Zhang et al.,<br>2019      | <a href="https://doi.org/10.1016/j.chemosphere.2019.04.115">https://doi.org/10.1016/j.chemosphere.2019.04.115</a> |   |  |   |   | x | x | x |   |  |   | x  | No  |
| Lin et al.,<br>2019        | <a href="https://doi.org/10.1016/j.ecoenv.2019.05.036">https://doi.org/10.1016/j.ecoenv.2019.05.036</a>           |   |  |   |   | x | x | x |   |  | x | x  | No  |
| Heinlaan et al.,<br>2020   | <a href="https://doi.org/10.1016/j.scitotenv.2019.136073">https://doi.org/10.1016/j.scitotenv.2019.136073</a>     | x |  | x |   |   |   | x |   |  | x |    | Yes |
| Besseling et al.,<br>2014  | <a href="https://doi.org/10.1021/es503001d">https://doi.org/10.1021/es503001d</a>                                 |   |  |   |   | x |   | x |   |  | x |    | Yes |
| Chae et al.,<br>2018       | <a href="https://doi.org/10.1038/s41598-017-18849-y">https://doi.org/10.1038/s41598-017-18849-y</a>               | x |  |   |   |   |   | x |   |  |   | x  | No  |
| Liu et al.,<br>2021        | <a href="https://doi.org/10.1016/j.jhazmat.2020.123778">https://doi.org/10.1016/j.jhazmat.2020.123778</a>         |   |  |   |   | x |   | x |   |  |   | x  | No  |
| Vaz et al.,<br>2021        | <a href="https://doi.org/10.1007/s11356-021-12455-2">https://doi.org/10.1007/s11356-021-12455-2</a>               |   |  |   |   | x |   | x |   |  | x |    | Yes |
| Reynolds et al.,<br>2019   | <a href="https://doi.org/10.1039/c9en00434c">https://doi.org/10.1039/c9en00434c</a>                               |   |  |   |   | x |   | x |   |  | x | x  | No  |
| Lin et al.,<br>2019        | <a href="https://doi.org/10.1016/j.jhazmat.2018.10.056">https://doi.org/10.1016/j.jhazmat.2018.10.056</a>         |   |  |   |   | x |   | x |   |  | x |    | No  |
| Liu et al.,<br>2021        | <a href="https://doi.org/10.1016/j.scitotenv.2020.144249">https://doi.org/10.1016/j.scitotenv.2020.144249</a>     | x |  |   |   |   |   | x |   |  | x | x  | No  |
| Wu et al.,<br>2019a        | <a href="https://doi.org/10.1016/j.envpol.2018.11.055">https://doi.org/10.1016/j.envpol.2018.11.055</a>           |   |  |   |   | x | x | x |   |  | x |    | Yes |
| Grintzalis et al.,<br>2019 | <a href="https://doi.org/10.1080/17435390.2019.1577510">https://doi.org/10.1080/17435390.2019.1577510</a>         |   |  |   |   | x |   | x |   |  | x |    | No  |
| Zhang et al.,<br>2020      | <a href="https://doi.org/10.1016/j.chemosphere.2019.124563">https://doi.org/10.1016/j.chemosphere.2019.124563</a> |   |  |   |   | x |   | x |   |  |   | x  | No  |
| Wu et al.,<br>2019b        | <a href="https://doi.org/10.1016/j.aquatox.2019.105350">https://doi.org/10.1016/j.aquatox.2019.105350</a>         |   |  | x |   |   |   | x |   |  |   | x  | No  |
| Liu et al.,<br>2020 a      | <a href="https://doi.org/10.1016/j.envpol.2019.113506">https://doi.org/10.1016/j.envpol.2019.113506</a>           |   |  |   |   | x |   | x |   |  | x | x  | No  |
| Liu et al.,<br>2020 b      | <a href="https://doi.org/10.1016/j.chemosphere.2020.126065">https://doi.org/10.1016/j.chemosphere.2020.126065</a> |   |  |   |   | x |   | x |   |  |   | x  | No  |
| Frankel et al.,<br>2020    | <a href="https://doi.org/10.1039/c9en01236b">https://doi.org/10.1039/c9en01236b</a>                               |   |  | x |   |   |   | x |   |  | x |    | Yes |
| Zhang et al.,<br>2019      | <a href="https://doi.org/10.1007/s11356-019-05031-2">https://doi.org/10.1007/s11356-019-05031-2</a>               |   |  |   |   | x |   | x |   |  | x | x  | No  |
| Fadare et al.,<br>2020     | <a href="https://doi.org/10.1021/acs.est.0c00615">https://doi.org/10.1021/acs.est.0c00615</a>                     |   |  | x |   |   |   | x |   |  | x | x  | No  |
| Zhang et al.,<br>2020      | <a href="https://doi.org/10.1016/j.envpol.2019.113451">https://doi.org/10.1016/j.envpol.2019.113451</a>           |   |  |   |   | x | x | x |   |  | x |    | No  |
| De Felice et al.,<br>2019  | <a href="https://doi.org/10.1016/j.chemosphere.2019.05.115">https://doi.org/10.1016/j.chemosphere.2019.05.115</a> |   |  |   |   | x |   | x |   |  | x |    | No  |
| Saavedra et al.,<br>2019   | <a href="https://doi.org/10.1016/j.envpol.2019.05.135">https://doi.org/10.1016/j.envpol.2019.05.135</a>           |   |  |   |   | x | x | x |   |  | x |    | No  |

|                        |                                                                                                                   |   |   |   |   |   |     |
|------------------------|-------------------------------------------------------------------------------------------------------------------|---|---|---|---|---|-----|
| De Felice et al., 2022 | <a href="https://doi.org/10.1016/j.envint.2022.107264">https://doi.org/10.1016/j.envint.2022.107264</a>           | x | x | x | x | x | No  |
| Ma et al., 2021        | <a href="https://doi.org/10.1016/j.bbr.2021.10.062">https://doi.org/10.1016/j.bbr.2021.10.062</a>                 | x | x |   |   | x | No  |
| Nogueira et al., 2022  | <a href="https://doi.org/10.1016/j.scitotenv.2021.151360">https://doi.org/10.1016/j.scitotenv.2021.151360</a>     | x | x |   | x | x | No  |
| Pochelon et al., 2021  | <a href="https://doi.org/10.3390/environments8100101">https://doi.org/10.3390/environments8100101</a>             |   | x |   | x |   | No  |
| Verdu et al., 2022     | <a href="http://dx.doi.org/10.1016/j.scitotenv.2022.153063">http://dx.doi.org/10.1016/j.scitotenv.2022.153063</a> | x | x |   | x |   | Yes |

**Table S2.** Minimum reporting information (MRI) list

To be filled in where applicable and included in the Supplementary information of the paper

| Studied nanoplastics                       | Test organism         | Sample preparation                                        | Exposure conditions            | Data quality                 |
|--------------------------------------------|-----------------------|-----------------------------------------------------------|--------------------------------|------------------------------|
| <b>Very important criteria</b>             |                       |                                                           |                                |                              |
| Polymer chemical composition               | test species          | removal of particle impurities and additives              | Exposure duration              | Number of replicates         |
| Particle origin                            | strain identification | dispersion medium                                         | exposure medium                | statistical method/model     |
| primary particle size                      | sex                   | medium properties (pH, O <sub>2</sub> , OM, conductivity) | Static OR flow through         | Negative control             |
| particle morphology                        | length                | particle dispersion aids                                  | Tested concentrations          | Reference (natural) particle |
| particle primary surface charge            | body weight           |                                                           | -                              | Test quality criteria        |
| particle primary surface functionalization | age                   |                                                           | Measured toxicity endpoints    |                              |
| particle (suspension) chemical impurities  | growth stage          |                                                           | Toxicity values/effect         |                              |
| particle (suspension) additives            |                       |                                                           |                                |                              |
| <b>Medium importance criteria</b>          |                       |                                                           |                                |                              |
| particle specific surface area             |                       | additional test medium properties                         | Toxicity recording frequencies | Reference chemical           |
|                                            |                       | leached chemicals                                         |                                | Nanoplastics background      |
|                                            |                       | -                                                         |                                |                              |
